# Supplementary material for: Synthesis of Pr3+-doped WO3 particles: correlation between photoluminescent and photocatalytic properties
Source: Royal Society of Chemistry journal article supplement (doi:10.1039/d3ra05136f), 2023-01-01
Supplement: d3ra05136f1.pdf [file d3ra05136f1.pdf]

Table S1 - Structural refinement data for WO<sub>3</sub>: Pr<sup>+3</sup> samples

| Samples                                | WO <sub>3</sub>   | WO <sub>3</sub> : 1% Pr | WO <sub>3</sub> : 2% Pr | WO <sub>3</sub> : 4% Pr |
|----------------------------------------|-------------------|-------------------------|-------------------------|-------------------------|
| Symmetry                               | Monoclinic        | Monoclinic              | Monoclinic              | Monoclinic              |
| Space group                            | P <sub>21/n</sub> | P <sub>21/n</sub>       | P <sub>21/n</sub>       | P <sub>21/n</sub>       |
| <i>a</i> (Å)                           | 7.3081            | 7.3088                  | 7.3112                  | 7.3138                  |
| <i>b</i> (Å)                           | 7.5331            | 7.5345                  | 7.5343                  | 7.5333                  |
| <i>c</i> (Å)                           | 7.6939            | 7.6957                  | 7.6953                  | 7.6945                  |
| <i>V</i> (Å) <sup>3</sup>              | 423.53            | 423.75                  | 423.86                  | 423.91                  |
| $\alpha = \gamma$ (°)                  | 90                |                         |                         |                         |
| $\beta$ (°)                            | 90.773            | 90.761                  | 90.799                  | 90.807                  |
| <i>D</i> (nm)                          | 36                | 38                      | 43                      | 54                      |
| <i>E</i> (x10 <sup>-3</sup> )          | 0.56              | 0.48                    | 0.44                    | 0.33                    |
| $\chi^2$                               | 2.53              | 1.56                    | 1.47                    | 1.41                    |
| <i>W</i> <sub>rp</sub> (%)             | 19.74             | 25.01                   | 25.09                   | 23.63                   |
| <i>W</i> <sub>p</sub> (%)              | 15.49             | 18.54                   | 18.79                   | 17.26                   |
| <i>R</i> <sub>f</sub> <sup>2</sup> (%) | 2.94              | 3.11                    | 1.85                    | 1.37                    |

Table S2 - Atomic position and the values of the length of the bonds (W-O)

| Atom site                    | <i>x</i> | <i>y</i> | <i>z</i> | Occupancy | Length of the bonds |
|------------------------------|----------|----------|----------|-----------|---------------------|
| <b>WO<sub>3</sub></b>        |          |          |          |           |                     |
| O1                           | 0.042    | 0.006    | 0.24     | 1         | (O1-W2): 2.1(3) Å   |
| O2                           | 1.016    | 0.428    | 0.176    | 1         | (O2-W2): 2.09(9) Å  |
| O3                           | 0.256    | 0.269    | 0.234    | 1         | (O3-W2): 2.73(12) Å |
| O4                           | 0.253    | 0.261    | 0.666    | 1         | (O4-W2): 1.93(9) Å  |
| O5                           | 0.0338   | -0.078   | 0.004    | 1         | (O5-W2): 2.16(10) Å |
| O6                           | 0.474    | 0.365    | 1.078    | 1         |                     |
| W1                           | 0.2506   | 0.0337   | 0.2836   | 1         |                     |
| W2                           | 0.2468   | 0.0332   | 0.7812   | 1         |                     |
| <b>WO<sub>3</sub>: 1% Pr</b> |          |          |          |           |                     |
| O1                           | -0.011   | 0.007    | 0.226    | 1         | (O1-W2): 1.90(2) Å  |
| O2                           | 1.035    | 0.4      | 0.124    | 1         | (O2-W2): 2.01(13) Å |
| O3                           | 0.25     | 0.263    | 0.26     | 1         | (O3-W2): 1.78(12) Å |
| O4                           | 0.265    | 0.287    | 0.626    | 1         | (O4-W2): 2.03(13) Å |
| O5                           | 0.384    | 0.184    | -0.016   | 1         | (O6-W2): 1.72(11) Å |
| O6                           | 0.287    | 0.47     | 0.999    | 1         |                     |
| W1                           | 0.2412   | 0.0284   | 0.2872   | 0.99      |                     |
| W2                           | 0.2485   | 0.0368   | 0.782    | 0.99      |                     |
| Pr1                          | 0.2412   | 0.0284   | 0.2872   | 0.01      |                     |
| Pr2                          | 0.2485   | 0.0368   | 0.782    | 0.01      |                     |
| <b>WO<sub>3</sub>: 2% Pr</b> |          |          |          |           |                     |
| O1                           | 0        | 0.039    | 0.207    | 1         | (O1-W2): 1.93(10) Å |
| O2                           | 1.011    | 0.477    | 0.192    | 1         | (O2-W2): 2.02(10) Å |
| O3                           | 0.272    | 0.254    | 0.291    | 1         | (O4-W2): 1.78(8) Å  |
| O4                           | 0.221    | 0.262    | 0.723    | 1         | (O5-W2): 1.74(7) Å  |

|                              |        |        |         |       |                     |
|------------------------------|--------|--------|---------|-------|---------------------|
| O5                           | 0.292  | 0.029  | 0.004   | 1     | (O6-W2): 2.06(8) Å  |
| O6                           | 0.38   | 0.325  | 1.017   | 1     |                     |
| W1                           | 0.2449 | 0.026  | 0.2854  | 0.977 |                     |
| W2                           | 0.2522 | 0.0344 | 0.7802  | 0.977 |                     |
| Pr1                          | 0.2449 | 0.026  | 0.2854  | 0.017 |                     |
| Pr2                          | 0.2522 | 0.0344 | 0.7802  | 0.017 |                     |
| <b>WO<sub>3</sub>: 4% Pr</b> |        |        |         |       |                     |
| O1                           | -0.004 | -0.013 | 0.237   | 1     | (O1-W2): 1.83(13) Å |
| O2                           | 1.054  | 0.491  | 0.217   | 1     | (O2-W2): 1.95(3) Å  |
| O3                           | 0.26   | 0.266  | 0.240   | 1     | (O4-W2): 2.03(7) Å  |
| O4                           | 0.218  | 0.261  | 0.724   | 1     | (O5-W2): 2.05(7) Å  |
| O5                           | 0.477  | 0.181  | -0.153  | 1     | (O6-W2): 1.84(5) Å  |
| O6                           | 0.241  | 0.495  | 1.002   | 1     |                     |
| W1                           | 0.2455 | 0.0294 | 0.28108 | 0.957 |                     |
| W2                           | 0.253  | 0.0287 | 0.7848  | 0.957 |                     |
| Pr1                          | 0.2455 | 0.0294 | 0.28108 | 0.037 |                     |
| Pr2                          | 0.253  | 0.0287 | 0.7848  | 0.037 |                     |
